# Supplementary material for: Analysis of Metabolites and Gene Expression Changes Relative to Apricot (Prunus armeniaca L.) Fruit Quality During Development and Ripening
Source: Front Plant Sci. 2020 Aug 19;11:1269. doi: 10.3389/fpls.2020.01269 (PMC7466674; doi:10.3389/fpls.2020.01269)
Supplement: Supplementary file 17 [file Table_7.xlsx]

## Sheet: Hoja1
Supplementary data Sheet 6. Homologous genes ( with their identified Prunus armeniaca (PARG) IDs) between Japanese apricot, peach and arabidopsis identify by BLAST procotol and it Interpro description.
	Gene_id	Gene_ID_P. Armeniaca_V01	Gene_name_P.Mume	P.persica Ensembl Gene ID	E value	% identity	Protein name	Interpro description	A.thaliana Homolog Ensembl Gene ID	A.thaliana description
1	gene8082	PARG03336m04*	LOC103324315	PRUPE_1G003000	0	96.4	PREDICTED: polyketide synthase 5-like	Chalcone/stilbene synthase, N-terminal		Chalcone and stilbene synthase family protein
2	gene8107	PARG00058m01*	LOC103324364	PRUPE_1G005300	0	96.3	PREDICTED: uncharacterized protein LOC107880134	Transcription termination factor, mitochondrial/chloroplastic	AT5G07900	Mitochondrial transcription termination factor family protein
3	gene8106	PARG03360m01**	LOC103324347	PRUPE_1G005900	8e-102	96.2	PREDICTED: uncharacterized protein LOC103324347	Transcription termination factor, mitochondrial/chloroplastic	AT5G07900	Mitochondrial transcription termination factor family protein
4	gene9230	PARG11132m03*	LOC103325811	PRUPE_1G006400	0	98.6		Cytochrome b5-like heme/steroid binding domain	AT2G32720	cytochrome B5 isoform B
5	gene9725	PARG10904m01*	LOC103326147	PRUPE_1G007500	0	98.5		Ankyrin repeat		Ankyrin repeat family protein
6	gene9966	PARG10347m01*	LOC103326427	PRUPE_1G008900	4.9e-179	98.2		Calcineurin-like phosphoesterase domain, ApaH type	AT2G32770	purple acid phosphatase 15
7	gene8044	PARG30354m02*	LOC103324267	PRUPE_1G010700	0	88.3	PREDICTED: disease resistance protein RGA2-like	NB-ARC		LRR and NB-ARC domains-containing disease resistance protein
8	gene19168	PARG29973m02*	LOC107881440	PRUPE_1G011200	0.00012	95.8	PREDICTED: uncharacterized protein LOC107881440	Protein time for coffee	AT3G22380	time for coffee
9	gene4085	***	LOC107880551	PRUPE_1G012300	3.3e-43	91.7
10	gene7873	PARG03673m01*	LOC103324102	PRUPE_1G013000	4.9e-113	99.5	PREDICTED: 5\'-nucleotidase SurE	Survival protein SurE-like phosphatase/nucleotidase	AT4G14930	Survival protein SurE-like phosphatase/nucleotidase
11	gene7946	PARG03473m01*	LOC103324190	PRUPE_1G035700	0	99.4	PREDICTED: 1-aminocyclopropane-1-carboxylate oxidase homolog 1-like	Oxoglutarate/iron-dependent dioxygenase	AT1G03400	2-oxoglutarate (2OG) and Fe(II)-dependent oxygenase superfamily protein
12	gene7921	PARG03642m01*	LOC103324123	PRUPE_1G038000	8.8e-176	97.4	PREDICTED: proline-rich extensin-like protein EPR1
13	gene7920	***	LOC103324105	PRUPE_1G038100	4.4e-111	97.4	PREDICTED: extensin-like
14	gene7918	PARG03665m01*	LOC103324104	PRUPE_1G038600	0	97.6	PREDICTED: probable inorganic phosphate transporter 1-3	Phosphate permease	AT5G43370	phosphate transporter 1;5
15	gene8127	PARG03705m01*	LOC103324401	PRUPE_1G042000	7.2e-171	92		Ubiquitin domain	AT1G11980	polyubiquitin 10
16	gene7605	PARG03760m01*	LOC103323849	PRUPE_1G047700	0	95.9	PREDICTED: putative disease resistance protein At1g50180	NB-ARC		Disease resistance protein (CC-NBS-LRR class) family
17	gene7655	***	LOC103323807	PRUPE_1G053300	0	98.3	PREDICTED: 7-deoxyloganetin glucosyltransferase-like	UDP-glucuronosyl/UDP-glucosyltransferase		UDP-Glycosyltransferase superfamily protein
18	gene7665	PARG10153m01*	LOC107880753	PRUPE_1G054400	1.7e-74	96.9		Coenzyme F420 hydrogenase/dehydrogenase beta subunit, C-terminal	AT1G04620	coenzyme F420 hydrogenase family / dehydrogenase, beta subunit family
19	gene7670	PARG03840m02*	LOC103323820	PRUPE_1G054900	0	97.8	PREDICTED: glutathione transferase GST 23-like	Glutathione S-transferase, N-terminal		glutathione S-transferase TAU 8
20	gene7573	***	LOC103323737	PRUPE_1G060400	0	98	PREDICTED: uncharacterized PE-PGRS family protein PE_PGRS46
21	gene7575	PARG29807m01*	LOC103323739	PRUPE_1G060700	0	98.3	PREDICTED: LOW QUALITY PROTEIN: receptor-like protein kinase 2	Protein kinase domain		Leucine-rich repeat receptor-like protein kinase family protein
22	gene16045	PARG21471m01*	LOC103333332	PRUPE_1G079600	2.6e-127	96.6		Digestive organ expansion factor, predicted	AT1G17690
23	gene7375	PARG04172m01*	LOC103323522	PRUPE_1G080700	0	97.7	PREDICTED: endochitinase EP3-like	Glycoside hydrolase, family 19, catalytic		homolog of carrot EP3-3 chitinase
24	gene7396	PARG04082m01**	LOC103323541	PRUPE_1G083300	0	97.1	PREDICTED: rust resistance kinase Lr10-like isoform X1	Protein kinase domain		lectin protein kinase family protein
25	gene7357	PARG04124m01*	LOC103323486	PRUPE_1G087000	0	97.9	PREDICTED: hydroxyproline O-galactosyltransferase GALT3-like	Glycosyl transferase, family 31		Galactosyltransferase family protein
26	gene7295	PARG04143m01*	LOC103323436	PRUPE_1G088600	0	97.8	PREDICTED: xyloglucan endotransglucosylase/hydrolase protein 24-like	Glycoside hydrolase family 16		xyloglucan endotransglycosylase 6
27	gene7314	***	LOC103323450	PRUPE_1G090500	0	99	PREDICTED: anthocyanidin 3-O-glucosyltransferase 7-like	UDP-glucuronosyl/UDP-glucosyltransferase		UDP-glucosyl transferase 78D2
28	gene7238	PARG24351m02*	LOC103323352	PRUPE_1G098000	4.1e-131	97.7	PREDICTED: protein ECERIFERUM 3	Fatty acid hydroxylase	AT5G57800	Fatty acid hydroxylase superfamily
29	gene7268	PARG04424m01*	LOC103323428	PRUPE_1G101400	0	95.2	PREDICTED: gamma-glutamyl peptidase 3-like	Glutamine amidotransferase	AT2G23960	Class I glutamine amidotransferase-like superfamily protein
30	gene7192	PARG04392m03*	LOC103323316	PRUPE_1G104100	0	98.1	PREDICTED: ABC transporter B family member 4-like	ABC transporter-like		ATP binding cassette subfamily B4
31	gene7166	PARG04365m02*	LOC103323278	PRUPE_1G106800	0	98.5	PREDICTED: pleiotropic drug resistance protein 3-like isoform X1	ABC transporter-like	AT4G15215	pleiotropic drug resistance 9
32	gene7004	***	LOC103323107	PRUPE_1G126200	0	98.2	PREDICTED: leucine-rich repeat extensin-like protein 6
33	gene6997	PARG04588m02*	LOC103323100	PRUPE_1G126900	0	99.5	PREDICTED: major allergen Pru av 1-like	Bet v I/Major latex protein		MLP-like protein 423
34	gene6993	PARG04595m01*	LOC103323090	PRUPE_1G127300	4.4e-97	90	PREDICTED: major allergen Pru ar 1-like	Bet v I/Major latex protein		MLP-like protein 423
35	gene6988	PARG04592m01**	LOC103323094	PRUPE_1G127800	4.6e-165	97.8	PREDICTED: major allergen Pru ar 1-like	Bet v I/Major latex protein		MLP-like protein 423
36	gene6994	PARG04593m01*	LOC103323088	PRUPE_1G128300	2.3e-157	97.4	PREDICTED: major allergen Pru ar 1-like	Bet v I/Major latex protein		MLP-like protein 423
37	gene6895	PARG05487m01*	LOC103322999	PRUPE_1G138000	0	97.7	PREDICTED: protein SRC2-like	C2 domain	AT4G15740	Calcium-dependent lipid-binding (CaLB domain) family protein
38	gene6824	PARG05552m01*	LOC103322899	PRUPE_1G145300	0	99	PREDICTED: uncharacterized protein LOC103322899 isoform X2	Inosine/uridine-preferring nucleoside hydrolase domain	AT5G18860	inosine-uridine preferring nucleoside hydrolase family protein
39	gene6811	***	LOC103322888	PRUPE_1G146400	0	96.8	PREDICTED: uncharacterized protein LOC103322888	Protein DMP	AT3G21550	DUF679 domain membrane protein 2
40	gene6669	PARG04316m02*	LOC103322685	PRUPE_1G159700	0	98.3	PREDICTED: probable sucrose-phosphate synthase 3	Sucrose synthase	AT1G04920	sucrose phosphate synthase 3F
41	gene6629	PARG05460m01*	LOC103322672	PRUPE_1G162800	6.8e-93	92.4	PREDICTED: cyclic nucleotide-gated ion channel 1-like	Cyclic nucleotide-binding domain	AT2G46440	cyclic nucleotide gated channel 1
42	gene6513	PARG05244m01*	LOC103322538	PRUPE_1G178400	0	97.4	PREDICTED: probable pectinesterase/pectinesterase inhibitor 35	Pectinesterase, catalytic	AT3G59010	pectin methylesterase 61
43	gene6464	***	LOC103322498	PRUPE_1G190600	0	96.9	PREDICTED: uncharacterized protein LOC103322498		AT1G05894
44	gene6402	***	LOC103322429	PRUPE_1G204800	0	97.2	PREDICTED: endochitinase EP3-like	Glycoside hydrolase, family 19, catalytic	AT3G54420	homolog of carrot EP3-3 chitinase
45	gene6357	PARG05037m04*	LOC103322391	PRUPE_1G205100	0	96	PREDICTED: cyclic nucleotide-gated ion channel 1-like	Cyclic nucleotide-binding domain		wall associated kinase 5
46	gene6361	***	LOC103322384	PRUPE_1G205400	0	96.4	PREDICTED: endochitinase EP3-like	Glycoside hydrolase, family 19, catalytic		homolog of carrot EP3-3 chitinase
47	gene6363	PARG05025m03*	LOC103322395	PRUPE_1G205800	4.7e-137	98.1	PREDICTED: uncharacterized protein LOC103322395. partial		AT3G59640
48	gene1579	PARG05279m01*	LOC107881243	PRUPE_1G230400	3.7e-23	90.9	PREDICTED: uncharacterized protein LOC107881243 isoform X1
49	gene26239	PARG26520m01*	LOC107882076	PRUPE_1G236200	2.7e-13	82.1	PREDICTED: uncharacterized mitochondrial protein AtMg00810-like. partial			RmlC-like cupins superfamily protein
50	gene5909	PARG06015m01*	LOC103321864	PRUPE_1G242400	0	97.8	PREDICTED: cytochrome P450 71B36-like	Cytochrome P450	AT1G13080	cytochrome P450, family 71, subfamily B, polypeptide 36
51	gene5884	***	LOC103321843	PRUPE_1G245400	0	98.6	PREDICTED: non-functional NADPH-dependent codeinone reductase 2-like	Aldo/keto reductase, conserved site	AT1G59950	NAD(P)-linked oxidoreductase superfamily protein
52	gene5850	PARG06083m01*	LOC103321804	PRUPE_1G249000	0	99.2	PREDICTED: high affinity nitrate transporter 2.5	Major facilitator superfamily	AT1G12940	nitrate transporter2.5
53	gene24107	PARG25411m01*	LOC103342403	PRUPE_1G298000	0	98.8	PREDICTED: protein PHYLLO. chloroplastic	Alpha/beta hydrolase fold-1	AT1G68890	magnesium ion binding;thiamin pyrophosphate binding;hydro-lyases;catalytics;2-succinyl-5-enolpyruvyl-6-hydroxy-3-cyclohexene-1-carboxylic-acid synthases
54	gene23613	PARG06712m01*	LOC103341655	PRUPE_1G305000	3.3e-140	96	PREDICTED: uncharacterized protein LOC103341428	Transmembrane Fragile-X-F-associated protein	AT1G68820	Transmembrane Fragile-X-F-associated protein
55	gene23614	PARG06759m01**	LOC103341675	PRUPE_1G305100	0	95.4	PREDICTED: leucoanthocyanidin reductase-like	NmrA-like domain		NAD(P)-binding Rossmann-fold superfamily protein
56	gene23659	***	LOC103341905	PRUPE_1G310300	5.4e-101	99	PREDICTED: tetraketide alpha-pyrone reductase 2	NAD-dependent epimerase/dehydratase	AT1G68540	NAD(P)-binding Rossmann-fold superfamily protein
57	gene23704	PARG02241m02*	LOC103342117	PRUPE_1G315000	0	95.1	PREDICTED: LEAF RUST 10 DISEASE-RESISTANCE LOCUS RECEPTOR-LIKE PROTEIN KINASE-like 2.1 isoform X3	Protein kinase domain		Protein kinase superfamily protein
58	gene23719	PARG28424m02*	LOC103342087	PRUPE_1G316900	0	99.2	PREDICTED: probable inactive leucine-rich repeat receptor-like protein kinase At1g66830	Protein kinase domain	AT2G01210	Leucine-rich repeat protein kinase family protein
59	gene23761	PARG02244m01**	LOC103342112	PRUPE_1G321200	1.2e-178	97	PREDICTED: probable S-adenosylmethionine-dependent methyltransferase At5g38780	SAM dependent carboxyl methyltransferase	AT3G44840	S-adenosyl-L-methionine-dependent methyltransferases superfamily protein
60	gene5518	PARG06862m01*	LOC103321445	PRUPE_1G332500	7.5e-102	96	PREDICTED: nudix hydrolase 17. mitochondrial-like	NUDIX hydrolase domain	AT2G01670	nudix hydrolase homolog 17
61	gene5073	PARG06863m01*	LOC103320955	PRUPE_1G332600	0	97	PREDICTED: probable RNA-dependent RNA polymerase 1	RNA-dependent RNA polymerase, eukaryotic-type	AT1G14790	RNA-dependent RNA polymerase 1
62	gene5095	PARG06902m01*	LOC103320975	PRUPE_1G336500	0	98.3	PREDICTED: zinc finger protein 4-like	Zinc finger C2H2-type		zinc finger protein 4
63	gene5103	PARG06910m01*	LOC103320981	PRUPE_1G337500	1.9e-134	98.8	PREDICTED: purple acid phosphatase 8-like	Calcineurin-like phosphoesterase domain, ApaH type		purple acid phosphatase 3
64	gene5119	PARG06924m01*	LOC103320997	PRUPE_1G339000	0	97.8	PREDICTED: D-galacturonate reductase-like	Aldo/keto reductase, conserved site		NAD(P)-linked oxidoreductase superfamily protein
65	gene5195	PARG06989m02*	LOC103321067	PRUPE_1G346500	2e-119	94.9	PREDICTED: 4-hydroxybenzoate geranyltransferase 2-like	UbiA prenyltransferase family	AT4G23660	polyprenyltransferase 1
66	gene5367	PARG07144m02*	LOC103321383	PRUPE_1G363400	0	97.5	PREDICTED: kinesin-like protein KIF22-A	Kinesin motor domain	AT1G20060	ATP binding microtubule motor family protein
67	gene5447	PARG07210m01*	LOC103321307	PRUPE_1G371500	0	99.3	PREDICTED: protein SHI RELATED SEQUENCE 5	Zinc finger, lateral root primordium type 1	AT1G75520	SHI-related sequence 5
68	gene5051	PARG07260m01*	LOC103320875	PRUPE_1G375700	0	98.1	PREDICTED: jasmonate O-methyltransferase-like	SAM dependent carboxyl methyltransferase	AT1G19640	jasmonic acid carboxyl methyltransferase
69	gene5048	PARG27723m02*	LOC107880450	PRUPE_1G376000	6e-146	97	PREDICTED: defensin-like protein 19	Knottin, scorpion toxin-like	AT1G19610	Arabidopsis defensin-like protein
70	gene5044	PARG07267m01**	LOC103320869	PRUPE_1G376400	1.4e-101	99	PREDICTED: LOW QUALITY PROTEIN: bifunctional dihydroflavonol 4-reductase/flavanone 4-reductase	NAD-dependent epimerase/dehydratase	AT5G42800	dihydroflavonol 4-reductase
71	gene4958	PARG07341m02*	LOC103320799	PRUPE_1G384800	0	97	PREDICTED: protein DETOXIFICATION 33	Multi antimicrobial extrusion protein	AT1G47530	MATE efflux family protein
72	gene4948	PARG07352m01*	LOC103320792	PRUPE_1G385900	0	97.2	PREDICTED: uncharacterized protein LOC103320792 isoform X1	Uncharacterised protein family UPF0114		Uncharacterised protein family (UPF0114)
73	gene4927	PARG07376m02*	LOC103320776	PRUPE_1G388600	0	99	PREDICTED: dof zinc finger protein DOF3.4	Zinc finger, Dof-type		OBF binding protein 1
74	gene4900	PARG07401m01*	LOC103320757	PRUPE_1G391300	0	97.4	PREDICTED: chitotriosidase-1-like	Glycoside hydrolase family 18, catalytic domain		Glycosyl hydrolase family protein with chitinase insertion domain
75	gene4818	PARG07466m01*	LOC103320681	PRUPE_1G399900	0	96.5	PREDICTED: glutamate receptor 2.9-like	Ionotropic glutamate receptor		glutamate receptor 2.7
76	gene4812	PARG07472m01*	LOC103320678	PRUPE_1G400600	0	97	PREDICTED: glutamate receptor 2.7-like	GPCR, family 3		glutamate receptor 2.7
77	gene4632	PARG07651m01*	LOC103320493	PRUPE_1G419600	0	98.4	PREDICTED: kinesin-related protein 11	Kinesin motor domain		P-loop containing nucleoside triphosphate hydrolases superfamily protein
78	gene4607	PARG07672m01*	LOC103320430	PRUPE_1G422400	0	97.7	PREDICTED: uncharacterized protein LOC103320430		AT1G10220	ZCF37
79	gene4553	PARG23978m01*	LOC107880428	PRUPE_1G427700	0	97.2	PREDICTED: putative leucine-rich repeat receptor-like serine/threonine-protein kinase At2g24130	Protein kinase domain	AT3G47090	Leucine-rich repeat protein kinase family protein
80	gene4552	PARG07726m01*	LOC103320388	PRUPE_1G427800	0	98.4	PREDICTED: putative receptor-like protein kinase At3g47110	Protein kinase domain	AT3G47090	Leucine-rich repeat protein kinase family protein
81	gene4521	PARG07761m01*	LOC103320366	PRUPE_1G431300	0	97.7	PREDICTED: LOW QUALITY PROTEIN: probable inactive receptor kinase At5g67200	Protein kinase domain	AT5G43020	Leucine-rich repeat protein kinase family protein
82	gene5389	PARG07779m01*	LOC103321387	PRUPE_1G433200	0	96.4		Peptidase S8/S53 domain		Subtilase family protein
83	gene10342	PARG10358m01**	LOC107880795	PRUPE_1G434800	6e-05	100		Ionotropic glutamate receptor		glutamate receptor 2
84	gene4405	PARG07882m01*	LOC103320253	PRUPE_1G444700	0	98	PREDICTED: receptor-like protein kinase HSL1	Protein kinase domain		Protein kinase family protein with leucine-rich repeat domain
85	gene4181	PARG08048m02*	LOC103320007	PRUPE_1G464600	1.2e-164	98.1	PREDICTED: potassium channel KAT3	Cyclic nucleotide-binding domain		potassium channel in Arabidopsis thaliana 3
86	gene4216	PARG08092m01*	LOC103320039	PRUPE_1G469900	0	97.7	PREDICTED: uncharacterized protein LOC103320039
87	gene4204	PARG07263m01*	LOC107880400	PRUPE_1G477700	0	96.6	PREDICTED: UPF0481 protein At3g47200-like	Protein of unknown function DUF247, plant
88	gene3899	PARG08231m01*	LOC103319693	PRUPE_1G480100	0	97.4	PREDICTED: probable carboxylesterase 17	Alpha/beta hydrolase fold-3		carboxyesterase 17
89	gene4003	PARG08322m01*	LOC103319903	PRUPE_1G490300	0	99.2	PREDICTED: amino-acid permease BAT1-like	Amino acid/polyamine transporter I		bidirectional amino acid transporter 1
90	gene4056	PARG08372m02*	LOC103319823	PRUPE_1G496400	1.6e-158	96.9	PREDICTED: uncharacterized protein LOC103319823 isoform X1	FBD domain		F-box/RNI-like superfamily protein
91	gene4066	PARG08385m01**	LOC103319916	PRUPE_1G497900	0	93.5	PREDICTED: esterase-like	GDSL lipase/esterase		GDSL-like Lipase/Acylhydrolase superfamily protein
92	gene16008	PARG08485m03*	LOC107881185	PRUPE_1G509300	0	96.8		F-box domain		F-box and associated interaction domains-containing protein
93	gene16024	PARG19472m01*	LOC103333213	PRUPE_1G511600	4.5e-155	99	PREDICTED: low affinity sulfate transporter 3	SLC26A/SulP transporter	AT1G77990	STAS domain / Sulfate transporter family
94	gene3876	PARG08586m01*	LOC103319666	PRUPE_1G519900	0	99.2	PREDICTED: 7-deoxyloganetin glucosyltransferase-like isoform X1	UDP-glucuronosyl/UDP-glucosyltransferase	AT1G22340	UDP-glucosyl transferase 85A2
95	gene3760	***	LOC103319542	PRUPE_1G520100	0	96.7	PREDICTED: 7-deoxyloganetin glucosyltransferase-like	UDP-glucuronosyl/UDP-glucosyltransferase	AT1G22340	UDP-glucosyl transferase 85A2
96	gene3762	PARG08584m01*	LOC103319547	PRUPE_1G520300	0	97.8	PREDICTED: 7-deoxyloganetin glucosyltransferase-like	UDP-glucuronosyl/UDP-glucosyltransferase	AT1G22340	UDP-glucosyl transferase 85A2
97	gene3804	PARG08626m02*	LOC103319588	PRUPE_1G524800	0	98.5	PREDICTED: protein DETOXIFICATION 27-like	Multi antimicrobial extrusion protein		MATE efflux family protein
98	gene3806	PARG08627m01*	LOC103319587	PRUPE_1G524900	0	94.5	PREDICTED: putative disease resistance protein RGA1	Leucine-rich repeat		NB-ARC domain-containing disease resistance protein
99	gene3805	PARG08628m01*	LOC103319628	PRUPE_1G525000	0	97.2	PREDICTED: protein DETOXIFICATION 27-like	Multi antimicrobial extrusion protein		MATE efflux family protein
100	gene3838	PARG08665m01*	LOC103319619	PRUPE_1G528800	0	93.5	PREDICTED: putative disease resistance protein RGA3	Leucine-rich repeat		NB-ARC domain-containing disease resistance protein
101	gene3840	PARG08755m01**	LOC103319636	PRUPE_1G529000	0	94.7	PREDICTED: putative disease resistance protein RGA1	Leucine-rich repeat		NB-ARC domain-containing disease resistance protein
102	gene3726	PARG08694m01*	LOC103319494	PRUPE_1G532000	0	98.8	PREDICTED: kinesin-like protein BC2	Kinesin motor domain	AT5G60930	P-loop containing nucleoside triphosphate hydrolases superfamily protein
103	gene3555	PARG08814m01*	LOC103319314	PRUPE_1G549400	7.6e-155	98	PREDICTED: endo-1.3;1.4-beta-D-glucanase-like	Dienelactone hydrolase	AT3G23600	alpha/beta-Hydrolases superfamily protein
104	gene994	***	LOC103326397	PRUPE_1G557200	2.5e-18	95	PREDICTED: probable disease resistance protein RPP1	NB-ARC		Disease resistance protein (TIR-NBS-LRR class) family
105	gene6359	PARG04642m01**	LOC107880436	PRUPE_1G572300	4.9e-06	96.3	PREDICTED: uncharacterized protein LOC107880309
106	gene25954	PARG18219m08*	LOC107880120	PRUPE_1G578200	6.5e-167	97.6	PREDICTED: uncharacterized protein LOC103344057
107	gene11029	PARG15337m01**	LOC103328101	PRUPE_2G000300	2e-05	86	PREDICTED: uncharacterized protein LOC103327530
108	gene13865	PARG18142m01**	LOC103331940	PRUPE_2G021500	1e-151	95.2	PREDICTED: cinnamoyl-CoA reductase 1-like	NAD-dependent epimerase/dehydratase	AT1G09500	NAD(P)-binding Rossmann-fold superfamily protein
109	gene25314	PARG01808m01**	LOC103343643	PRUPE_2G030900	0	97.2	PREDICTED: proline-rich protein 4-like
110	gene25557	PARG01435m01*	LOC103343848	PRUPE_2G064900	0	93.1	PREDICTED: probable leucine-rich repeat receptor-like protein kinase At1g35710	Protein kinase domain	AT1G35710	Leucine-rich repeat receptor-like protein kinase family protein
111	gene9737	PARG10745m01*	LOC103326184	PRUPE_2G104600	0	90.6	PREDICTED: receptor-like protein 2	Leucine-rich repeat		Leucine-rich receptor-like protein kinase family protein
112	gene18868	PARG22582m01*	LOC103336524	PRUPE_2G113200	0	95.2	PREDICTED: TMV resistance protein N-like	Toll/interleukin-1 receptor homology (TIR) domain	AT5G45240	disease resistance protein (TIR-NBS-LRR class), putative
113	gene14709	PARG18460m01*	LOC103332250	PRUPE_2G130400	0	90.3	PREDICTED: receptor-like protein 12	Leucine-rich repeat		receptor like protein 6
114	gene15009	PARG18437m02*	LOC103332280	PRUPE_2G151200	6.3e-122	98.3	PREDICTED: MADS-box protein SOC1	Transcription factor, MADS-box	AT2G45660	AGAMOUS-like 20
115	gene14930	PARG18457m01*	LOC103332253	PRUPE_2G157900	1.5e-141	94.3	PREDICTED: H/ACA ribonucleoprotein complex subunit 4-like	Plectin/S10, N-terminal	AT5G41520	RNA binding Plectin/S10 domain-containing protein
116	gene14960	PARG08962m01**	LOC107880158	PRUPE_2G160900	0	96.3	PREDICTED: (+)-neomenthol dehydrogenase-like	Short-chain dehydrogenase/reductase SDR	AT1G01800	NAD(P)-binding Rossmann-fold superfamily protein
117	gene14963	PARG10479m01**	LOC107880147	PRUPE_2G161500	0	98.3	PREDICTED: (+)-neomenthol dehydrogenase-like	Short-chain dehydrogenase/reductase SDR	AT1G01800	NAD(P)-binding Rossmann-fold superfamily protein
118	gene25038	PARG16587m01*	LOC103343345	PRUPE_2G164900	0	96.1	PREDICTED: O-glucosyltransferase rumi homolog	Lipopolysaccharide-modifying protein	AT3G61270	downstream target of AGL15 2
119	gene25040	PARG16587m01*	LOC103343344	PRUPE_2G165200	0	96.1	PREDICTED: O-glucosyltransferase rumi homolog	Lipopolysaccharide-modifying protein	AT3G61270	downstream target of AGL15 2
120	gene7194	PARG04392m01**	LOC103323318	PRUPE_2G166500	0	95.5	PREDICTED: ABC transporter B family member 4-like	ABC transporter-like		P-glycoprotein 11
121	gene25020	PARG01942m01**	LOC103343405	PRUPE_2G167600	0	97.6	PREDICTED: leucine-rich repeat receptor-like serine/threonine-protein kinase At1g17230	Leucine-rich repeat		disease resistance family protein / LRR family protein
122	gene24819	PARG17330m01**	LOC103343027	PRUPE_2G176100	1e-65	93.6	PREDICTED: uncharacterized protein LOC103342790 isoform X2
123	gene15326	PARG18828m01*	LOC103332564	PRUPE_2G182900	0	98.6	PREDICTED: putative glucose-6-phosphate 1-epimerase	Aldose 1-/Glucose-6-phosphate 1-epimerase	AT3G61610	Galactose mutarotase-like superfamily protein
124	gene15307	PARG18766m01*	LOC103332406	PRUPE_2G184800	0	97.5	PREDICTED: hydroquinone glucosyltransferase-like	UDP-glucuronosyl/UDP-glucosyltransferase	AT1G01390	UDP-Glycosyltransferase superfamily protein
125	gene15298	***	LOC103332400	PRUPE_2G185700	0	98.4	PREDICTED: pentatricopeptide repeat-containing protein At4g01030. mitochondrial	Pentatricopeptide repeat	AT4G01030	pentatricopeptide (PPR) repeat-containing protein
126	gene15295	***	LOC103332355	PRUPE_2G186000	5.9e-143	93.6	PREDICTED: BTB/POZ domain-containing protein At4g08455-like	BTB/POZ domain		BTB/POZ domain-containing protein
127	gene15210	PARG18617m01*	LOC103332309	PRUPE_2G196000	0	98.6	PREDICTED: 3-ketoacyl-CoA synthase 1	Very-long-chain 3-ketoacyl-CoA synthase	AT1G01120	3-ketoacyl-CoA synthase 1
128	gene15369	PARG08502m02*	LOC103332981	PRUPE_2G206600	0	98.2	PREDICTED: protein NUCLEAR FUSION DEFECTIVE 4-like	Nodulin-like	AT2G39210	Major facilitator superfamily protein
129	gene15432	PARG04034m02*	LOC103333003	PRUPE_2G211800	0	98.6	PREDICTED: phenylalanine ammonia-lyase 1	Aromatic amino acid lyase	AT5G04230	PHE ammonia lyase 1
130	gene15481	PARG21471m01*	LOC103333010	PRUPE_2G217400	0	97.6	PREDICTED: uncharacterized protein LOC103332400
131	gene15487	PARG01856m01*	LOC103333117	PRUPE_2G218000	8.7e-136	98.8	PREDICTED: LOB domain-containing protein 1-like	Lateral organ boundaries, LOB	AT1G07900	LOB domain-containing protein 1
132	gene15583	PARG19510m01*	LOC103333172	PRUPE_2G224800	0	97	PREDICTED: ABC transporter G family member 6-like	ABC transporter-like	AT5G13580	ABC-2 type transporter family protein
133	gene10601	PARG28632m01*	LOC103327289	PRUPE_2G229300	4.5e-48	89.1	PREDICTED: uncharacterized protein LOC103327046			Homeodomain-like superfamily protein
134	gene16170	PARG19520m01*	LOC103333733	PRUPE_2G294900	0	97.8	PREDICTED: protein O-glucosyltransferase 1-like	Lipopolysaccharide-modifying protein	AT3G48980	Arabidopsis thaliana protein of unknown function (DUF821)
135	gene16167	PARG19611m01*	LOC103333663	PRUPE_2G295300	0	96.7	PREDICTED: uncharacterized protein LOC103333213	PAR1	AT5G52390	PAR1 protein
136	gene25700	PARG24278m01**	LOC103343960	PRUPE_2G299200	0	97.8	PREDICTED: protein DETOXIFICATION 35-like	Multi antimicrobial extrusion protein	AT4G25640	detoxifying efflux carrier 35
137	gene16694	PARG19968m01*	LOC103333874	PRUPE_2G299300	0	98.2	PREDICTED: protein DETOXIFICATION 35-like. partial	Multi antimicrobial extrusion protein	AT4G25640	MATE efflux family protein
138	gene16691	***	LOC103334100	PRUPE_2G299500	0	96.3	PREDICTED: LOW QUALITY PROTEIN: proline--tRNA ligase. chloroplastic/mitochondrial	Anticodon-binding	AT5G52520	Class II aaRS and biotin synthetases superfamily protein
139	gene16686	PARG19986m01**	LOC103333857	PRUPE_2G300000	0	97.8	PREDICTED: uncharacterized membrane protein YjcL	Protein of unknown function DUF819	AT5G52540	Protein of unknown function (DUF819)
140	gene16653	PARG19856m01**	LOC103334001	PRUPE_2G303300	0	98.5	PREDICTED: late embryogenesis abundant protein At1g64065-like	Late embryogenesis abundant protein, LEA_2 subgroup		Late embryogenesis abundant (LEA) hydroxyproline-rich glycoprotein family
141	gene16652	PARG04832m02*	LOC103333822	PRUPE_2G303400	0	98	PREDICTED: probable membrane-associated kinase regulator 5. partial	Probable membrane-associated kinase regulator 2/5	AT5G52870
142	gene16602	PARG19516m02*	LOC103333792	PRUPE_2G308300	2.6e-177	97.4	PREDICTED: probable trehalose-phosphate phosphatase C	Trehalose-phosphatase		Haloacid dehalogenase-like hydrolase (HAD) superfamily protein
143	gene16528	***	LOC103333786	PRUPE_2G315800	0	98.5	PREDICTED: AAA-ATPase At2g46620-like	AAA+ ATPase domain		P-loop containing nucleoside triphosphate hydrolases superfamily protein
144	gene10825	PARG16037m01**	LOC103327459	PRUPE_3G006300	0	96.5	PREDICTED: transcription factor MYB108	SANT/Myb domain	AT2G47190	myb domain protein 2
145	gene10886	PARG01100m01*	LOC103327466	PRUPE_3G013700	0	97.5	PREDICTED: butyrate--CoA ligase AAE11. peroxisomal-like	AMP-dependent synthetase/ligase	AT1G65890	acyl activating enzyme 12
146	gene10960	PARG05385m01*	LOC103327530	PRUPE_3G021100	6.8e-102	96	PREDICTED: uncharacterized protein LOC103327421 isoform X2
147	gene11000	PARG15761m01*	LOC103327693	PRUPE_3G024700	0	97.8	PREDICTED: receptor-like protein 2	Leucine-rich repeat		Leucine-rich receptor-like protein kinase family protein
148	gene11016	PARG15452m01**	LOC103328016	PRUPE_3G026200	0	98.1	PREDICTED: beta-amyrin synthase	Terpene synthase, conserved site		Terpenoid cyclases family protein
149	gene11225	PARG15135m02*	LOC103328252	PRUPE_3G048300	0	98.2	PREDICTED: beta-fructofuranosidase. insoluble isoenzyme CWINV1-like	Glycoside hydrolase, family 32	AT3G13790	Glycosyl hydrolases family 32 protein
150	gene11463	PARG15083m01*	LOC103328261	PRUPE_3G076500	0	96.9	PREDICTED: pleiotropic drug resistance protein 1-like	ABC transporter-like	AT1G15520	pleiotropic drug resistance 12
151	gene11519	***	LOC103328263	PRUPE_3G086400	2.1e-90	96	PREDICTED: cucumber peeling cupredoxin-like
152	gene11544	PARG01425m02*	LOC103328471	PRUPE_3G089700	0	97.9	PREDICTED: LEAF RUST 10 DISEASE-RESISTANCE LOCUS RECEPTOR-LIKE PROTEIN KINASE-like 2.2	Protein kinase domain		Protein kinase family protein
153	gene11690	PARG14506m01*	LOC103328642	PRUPE_3G107300	0	97.8	PREDICTED: 4-coumarate--CoA ligase 1-like	AMP-dependent synthetase/ligase	AT1G51680	4-coumarate:CoA ligase 2
154	gene11707	PARG01306m01*	LOC103328695	PRUPE_3G110100	0	98.8	PREDICTED: cysteine-rich repeat secretory protein 38-like	Gnk2-homologous domain	AT3G22030	Receptor-like protein kinase-related family protein
155	gene11713	PARG14110m01*	LOC103328959	PRUPE_3G110400	0	96	PREDICTED: F-box/kelch-repeat protein At3g23880-like	F-box domain		F-box and associated interaction domains-containing protein
156	gene11711	PARG13999m01*	LOC103328848	PRUPE_3G110600	0	97.9	PREDICTED: F-box/kelch-repeat protein At3g23880-like	F-box domain		F-box and associated interaction domains-containing protein
157	gene20548	PARG25089m01*	LOC103338806	PRUPE_3G123400	7.8e-88	95.5	PREDICTED: uncharacterized protein LOC103338208	Zinc finger, CCHC-type		MuDR family transposase
158	gene11843	PARG14848m01**	LOC107880963	PRUPE_3G134900	0	96.2	PREDICTED: GATA zinc finger domain-containing protein 14	Protein E6-like
159	gene24724	***	LOC103342801	PRUPE_3G144000	0	96.9	PREDICTED: LOW QUALITY PROTEIN: thaumatin-like protein 1	Thaumatin family		Pathogenesis-related thaumatin superfamily protein
160	gene12045	PARG10539m01*	LOC103329025	PRUPE_3G148300	0	98.2	PREDICTED: thaumatin-like protein 1	Thaumatin family		Pathogenesis-related thaumatin superfamily protein
161	gene12340	PARG13806m01*	LOC103329343	PRUPE_3G180900	0	98.5	PREDICTED: protein DETOXIFICATION 41-like	Multi antimicrobial extrusion protein	AT3G59030	MATE efflux family protein
162	gene12352	PARG13545m01*	LOC103329477	PRUPE_3G181900	0	98	PREDICTED: wall-associated receptor kinase-like 9 isoform X2	Protein kinase domain		wall associated kinase-like 2
163	gene12211	PARG00063m07*	LOC103329217	PRUPE_3G188600	0	96.6	PREDICTED: 7-deoxyloganetin glucosyltransferase-like isoform X2	UDP-glucuronosyl/UDP-glucosyltransferase		UDP-glucosyl transferase 85A3
164	gene12676	PARG12928m01*	LOC103329840	PRUPE_3G210100	0	98.5	PREDICTED: armadillo repeat-containing protein 3	Armadillo	AT2G05810	ARM repeat superfamily protein
165	gene12777	PARG13187m01*	LOC103330065	PRUPE_3G225200	0	93.9	PREDICTED: uncharacterized protein LOC103329477	Protein kinase domain		receptor kinase 3
166	gene12930	PARG11411m01*	LOC103330129	PRUPE_3G243000	0	98.9	PREDICTED: tryptophan synthase beta chain 2	Pyridoxal-phosphate dependent enzyme	AT5G38530	tryptophan synthase beta type 2
167	gene13410	PARG12740m01*	LOC103330396	PRUPE_3G260000	0	97.7	PREDICTED: UDP-glycosyltransferase 708D1-like	UDP-glucuronosyl/UDP-glucosyltransferase		UDP-glucosyl transferase 71B5
168	gene13143	PARG12730m02*	LOC103330304	PRUPE_3G287200	0	97.1	PREDICTED: polygalacturonase At1g48100	Glycoside hydrolase, family 28	AT5G14650	Pectin lyase-like superfamily protein
169	gene12958	PARG12882m01*	LOC107880999	PRUPE_3G291900	1.5e-54	99.1		ABC transporter-like		transporter associated with antigen processing protein 1
170	gene13063	PARG12719m02*	LOC103330292	PRUPE_3G295000	2e-147	97.3	PREDICTED: E3 ubiquitin-protein ligase RGLG2-like	Zinc finger, RING-type	AT5G14420	RING domain ligase2
171	gene13022	PARG12926m01**	LOC103330171	PRUPE_3G298500	0	96.9	PREDICTED: uncharacterized protein LOC103329734		AT5G40690
172	gene13562	PARG09109m01**	LOC103331857	PRUPE_3G308200	7.7e-149	98.6	PREDICTED: LOW QUALITY PROTEIN: probable WRKY transcription factor 45	WRKY domain	AT5G13080	WRKY DNA-binding protein 75
173	gene13550	***	LOC103331643	PRUPE_3G309400	0	98.4	PREDICTED: omega-hydroxypalmitate O-feruloyl transferase-like	Transferase	AT5G41040	HXXXD-type acyl-transferase family protein
174	gene13537	PARG17014m01*	LOC103331042	PRUPE_3G310600	0	97.9	PREDICTED: NAC domain-containing protein 41	NAC domain		NAC domain containing protein 83
175	gene10528	***	LOC103327168	PRUPE_4G007300	0	98.3	PREDICTED: calcium-transporting ATPase 12. plasma membrane-type-like	Cation-transporting P-type ATPase, C-terminal		ATPase E1-E2 type family protein / haloacid dehalogenase-like hydrolase family protein
176	gene8308	PARG05293m01*	LOC103324572	PRUPE_4G027900	0	95.3	PREDICTED: cysteine-rich receptor-like protein kinase 29	Protein kinase domain	AT4G04500	cysteine-rich RLK (RECEPTOR-like protein kinase) 29
177	gene8316	PARG12332m01*	LOC103324644	PRUPE_4G028000	2.4e-125	90	PREDICTED: putative receptor-like protein kinase At4g00960	Gnk2-homologous domain	AT4G11521	cysteine-rich RLK (RECEPTOR-like protein kinase) 25
178	gene8358	PARG12308m01*	LOC103324661	PRUPE_4G032500	0	94.9	PREDICTED: G-type lectin S-receptor-like serine/threonine-protein kinase At1g61370 isoform X1	Protein kinase domain		S-locus lectin protein kinase family protein
179	gene8399	***	LOC103324677	PRUPE_4G036900	0	98.3	PREDICTED: heterogeneous nuclear ribonucleoprotein U-like protein 1	SPRY domain
180	gene8400	PARG12333m01*	LOC103324706	PRUPE_4G037000	1.2e-154	96.1	PREDICTED: uncharacterized protein LOC103324644		AT4G05018
181	gene8418	PARG12284m01*	LOC103324714	PRUPE_4G039400	1.4e-113	97.8	PREDICTED: uncharacterized protein F12A10.7		AT4G21620
182	gene8436	PARG12255m01*	LOC103324728	PRUPE_4G041400	0	98	PREDICTED: polyphenol oxidase. chloroplastic	Tyrosinase copper-binding domain
183	gene8441	PARG12229m01*	LOC103324754	PRUPE_4G041800	0	98.2	PREDICTED: polyphenol oxidase. chloroplastic-like. partial	Tyrosinase copper-binding domain
184	gene8460	PARG03930m01*	LOC103324785	PRUPE_4G043200	1.2e-129	96.1	PREDICTED: AB hydrolase superfamily protein YfhM-like	Alpha/beta hydrolase fold-1	AT2G26750	alpha/beta-Hydrolases superfamily protein
185	gene7814	PARG03417m03*	LOC103324062	PRUPE_4G045500	1.5e-128	96.7	PREDICTED: uncharacterized protein LOC103324190	Domain of unknown function DUF1771		silencing defective 5
186	gene8489	PARG12137m01*	LOC103324853	PRUPE_4G046000	0	96.3	PREDICTED: heat stress transcription factor B-2a-like	Heat shock factor (HSF)-type, DNA-binding		heat shock transcription factor B2A
187	gene8569	PARG12015m01*	LOC103324899	PRUPE_4G056600	0	98.2	PREDICTED: glutamate receptor 2.7-like	Ionotropic glutamate receptor		glutamate receptor 2.7
188	gene8611	PARG11970m01*	LOC103325034	PRUPE_4G067000	0	96.8	PREDICTED: uncharacterized protein LOC103324892	Precursor of CEP13/CEP14	AT1G29290
189	gene8617	PARG12142m01**	LOC103325091	PRUPE_4G067600	0	97.3	PREDICTED: ER lumen protein-retaining receptor A	ER lumen protein retaining receptor	AT1G29330	ER lumen protein retaining receptor family protein
190	gene8736	PARG11785m01*	LOC103325246	PRUPE_4G073300	3.6e-150	97.6	PREDICTED: uncharacterized protein LOC103325034	AWPM-19-like	AT1G29520	AWPM-19-like family protein
191	gene8865	PARG11706m01*	LOC103325288	PRUPE_4G085700	0	97.5	PREDICTED: uncharacterized protein LOC103325162
192	gene8929	***	LOC103325298	PRUPE_4G092800	1.6e-77	89.7	PREDICTED: cyclic nucleotide-gated ion channel 1-like	Cyclic nucleotide-binding domain	AT2G46440	cyclic nucleotide gated channel 1
193	gene8985	PARG11659m01*	LOC103325326	PRUPE_4G098400	0	98.9	PREDICTED: flavin-dependent oxidoreductase FOX2-like	FAD linked oxidase, N-terminal		FAD-binding Berberine family protein
194	gene8986	PARG11631m01*	LOC103325342	PRUPE_4G098500	0	98.6	PREDICTED: flavin-dependent oxidoreductase FOX5-like	FAD linked oxidase, N-terminal	AT1G26380	FAD-binding Berberine family protein
195	gene8998	PARG11551m01*	LOC103325433	PRUPE_4G099600	0	97.8	PREDICTED: patellin-4	CRAL-TRIO lipid binding domain	AT1G30690	Sec14p-like phosphatidylinositol transfer family protein
196	gene9030	PARG11474m01*	LOC103325497	PRUPE_4G103300	0	97.9	PREDICTED: beta-amyrin 28-oxidase-like isoform X3	Cytochrome P450		cytochrome P450, family 716, subfamily A, polypeptide 1
197	gene9059	PARG00895m01*	LOC103325523	PRUPE_4G106100	0	97.8	PREDICTED: transcription factor JUNGBRUNNEN 1-like	NAC domain		NAC domain containing protein 42
198	gene9108	PARG00970m01**	LOC103325529	PRUPE_4G110700	9.1e-135	99.6	PREDICTED: cysteine-rich and transmembrane domain-containing protein B-like
199	gene9163	PARG11339m01*	LOC103325535	PRUPE_4G116600	0	97.6	PREDICTED: polygalacturonase QRT3	Parallel beta-helix repeat	AT4G20050	Pectin lyase-like superfamily protein
200	gene9202	PARG03363m01*	LOC103325621	PRUPE_4G120100	0	98.9	PREDICTED: LRR receptor-like serine/threonine-protein kinase GSO1	Protein kinase domain	AT4G20140	Leucine-rich repeat transmembrane protein kinase
201	gene9240	PARG10307m01*	LOC103325820	PRUPE_4G124100	4.9e-173	96.1	PREDICTED: uncharacterized protein LOC103325558	Protein of unknown function DUF212	AT3G12685	Acid phosphatase/vanadium-dependent haloperoxidase-related protein
202	gene8702	PARG11866m01*	LOC103325162	PRUPE_4G128100	4.5e-55	99.1	PREDICTED: succinate-semialdehyde dehydrogenase. mitochondrial-like	Succinate semialdehyde dehydrogenase	AT1G79440	aldehyde dehydrogenase 5F1
203	gene14196	PARG18540m01*	LOC103332145	PRUPE_4G129000	0	91.6	PREDICTED: probable LRR receptor-like serine/threonine-protein kinase At4g08850	Protein kinase domain	AT1G35710	Leucine-rich repeat receptor-like protein kinase family protein
204	gene9533	PARG10952m01**	LOC103326106	PRUPE_4G145600	0	96.2	PREDICTED: serine/threonine-protein kinase WAG1	Protein kinase domain	AT3G14370	WAG 1
205	gene9494	PARG10841m01*	LOC103326000	PRUPE_4G149800	0	96	PREDICTED: disease resistance protein RPM1-like	NB-ARC		NB-ARC domain-containing disease resistance protein
206	gene9465	PARG11105m01*	LOC103325905	PRUPE_4G152700	0	99	PREDICTED: cytochrome P450 CYP72A219-like isoform X1	Cytochrome P450	AT1G17060	cytochrome P450, family 72, subfamily A, polypeptide 13
207	gene9596	PARG10941m01*	LOC103326119	PRUPE_4G158200	2e-145	98.6	PREDICTED: seipin-2-like	Seipin family		Putative adipose-regulatory protein (Seipin)
208	gene9782	PARG10672m01**	LOC103326244	PRUPE_4G164000	0	99	PREDICTED: chitinase 2-like	2S globulin
209	gene9769	PARG10708m01*	LOC103326217	PRUPE_4G165500	0	97.4	PREDICTED: epidermis-specific secreted glycoprotein EP1-like	Bulb-type lectin domain	AT1G78820	Curculin-like (mannose-binding) lectin family protein
210	gene9636	PARG03374m01*	LOC103326141	PRUPE_4G174300	0	98.4	PREDICTED: D-amino-acid transaminase. chloroplastic-like	Aminotransferase class IV		D-aminoacid aminotransferase-like PLP-dependent enzymes superfamily protein
211	gene9799	***	LOC103326341	PRUPE_4G178300	0	98.3	PREDICTED: B3 domain-containing protein Os01g0723500-like	B3 DNA binding domain		Transcriptional factor B3 family protein
212	gene9839	PARG10603m01*	LOC103326351	PRUPE_4G183300	0	98	PREDICTED: E3 ubiquitin-protein ligase RMA1H1-like	Zinc finger, RING-type	AT4G27470	RING membrane-anchor 1
213	gene9872	PARG10524m01*	LOC103326361	PRUPE_4G186500	4.6e-173	98.5	PREDICTED: beta-glucosidase 18-like isoform X1	Glycoside hydrolase family 1		B-S glucosidase 44
214	gene9876	PARG03389m02*	LOC103326368	PRUPE_4G187200	0	96.4	PREDICTED: uncharacterized protein LOC103326341		AT3G15518
215	gene9937	PARG01095m01**	LOC103326372	PRUPE_4G193600	0	97.3	PREDICTED: G-type lectin S-receptor-like serine/threonine-protein kinase At4g27290 isoform X1	Protein kinase domain		receptor kinase 3
216	gene9948	***	LOC103326407	PRUPE_4G196000	7.4e-175	98.2	PREDICTED: G-type lectin S-receptor-like serine/threonine-protein kinase SD1-1 isoform X1	Protein kinase domain		receptor kinase 3
217	gene9963	PARG10319m01**	LOC103326410	PRUPE_4G197800	0	98.8	PREDICTED: LOW QUALITY PROTEIN: organic cation/carnitine transporter 4	Major facilitator, sugar transporter-like	AT3G20660	organic cation/carnitine transporter4
218	gene25661	PARG25448m01*	LOC103343942	PRUPE_4G198100	0	98.4	PREDICTED: cytochrome P450 71A25-like	Cytochrome P450		cytochrome P450, family 71, subfamily A, polypeptide 25
219	gene24579	PARG26597m01*	LOC103342585	PRUPE_4G202700	0	95.5	PREDICTED: protein ACCELERATED CELL DEATH 6-like	Ankyrin repeat		ankyrin repeat family protein
220	gene24581	PARG08194m01*	LOC107880260	PRUPE_4G203100	0	97	PREDICTED: ankyrin repeat-containing protein At5g02620	Ankyrin repeat		ankyrin repeat family protein
221	gene9992	***	LOC103326428	PRUPE_4G208300	0	97.3	PREDICTED: putative F-box/LRR-repeat protein At1g56400	F-box domain	AT1G56400	F-box family protein
222	gene10071	PARG10024m01*	LOC103326749	PRUPE_4G212900	8.4e-137	92.8	PREDICTED: uncharacterized protein LOC103326461 isoform X10			Toll-Interleukin-Resistance (TIR) domain family protein
223	gene10070	PARG09425m01*	LOC103326688	PRUPE_4G213200	1e-140	98.7	PREDICTED: psbP domain-containing protein 6. chloroplastic	PsbP, C-terminal	AT3G56650	Mog1/PsbP/DUF1795-like photosystem II reaction center PsbP family protein
224	gene10037	PARG22281m01*	LOC103326648	PRUPE_4G216300	2.9e-115	99.1	PREDICTED: GDSL esterase/lipase At5g55050-like	GDSL lipase/esterase		GDSL-like Lipase/Acylhydrolase superfamily protein
225	gene10032	PARG10003m18*	LOC103326556	PRUPE_4G216800	3e-166	98.1	PREDICTED: glycine-rich cell wall structural protein
226	gene10031	***	LOC103326494	PRUPE_4G216900	2e-141	98.2	PREDICTED: dihydrolipoyllysine-residue succinyltransferase component of 2-oxoglutarate dehydrogenase complex 2. mitochondrial-like	Biotin/lipoyl attachment	AT5G55070	Dihydrolipoamide succinyltransferase
227	gene10026	PARG10024m01*	LOC103326767	PRUPE_4G217600	0	97.8	PREDICTED: mitogen-activated protein kinase kinase kinase NPK1-like	Protein kinase domain	AT4G26890	mitogen-activated protein kinase kinase kinase 15
228	gene17781	PARG29722m01*	LOC103335288	PRUPE_4G218200	6e-09	58.3		Zinc finger, BED-type
229	gene10008	PARG10392m01**	LOC103326460	PRUPE_4G219700	0	96.4	PREDICTED: ribonuclease 3-like protein 2	Ribonuclease III domain	AT3G20420	RNAse THREE-like protein 2
230	gene9482	PARG11013m01*	LOC103325982	PRUPE_4G221400	0	96.1	PREDICTED: F-box/kelch-repeat protein At3g23880-like	F-box domain		F-box and associated interaction domains-containing protein
231	gene10145	PARG28356m01*	LOC103326797	PRUPE_4G224100	0	97.6	PREDICTED: putative BPI/LBP family protein At1g04970	Lipid-binding serum glycoprotein, C-terminal		lipid-binding serum glycoprotein family protein
232	gene24736	PARG26331m01**	LOC103342927	PRUPE_4G234600	0	99.5	PREDICTED: zinc finger CCCH domain-containing protein 18-like isoform X1	RNA recognition motif domain		CCCH-type zinc fingerfamily protein with RNA-binding domain
233	gene10276	PARG01173m01**	LOC103326846	PRUPE_4G245500	0	98.5	PREDICTED: extensin-3-like
234	gene10332	PARG09379m01**	LOC103326858	PRUPE_4G255600	0	95.9	PREDICTED: glucan endo-1.3-beta-glucosidase-like	Glycoside hydrolase family 17		Glycosyl hydrolase superfamily protein
235	gene10667	***	LOC103327421	PRUPE_4G260400	0	96.1	PREDICTED: protein N-lysine methyltransferase METTL21A	Lysine methyltransferase	AT2G26810	Putative methyltransferase family protein
236	gene10368	PARG10572m01*	LOC107880789	PRUPE_4G262800	8.1e-174	98.8	PREDICTED: probable inactive 2-oxoglutarate-dependent dioxygenase AOP2	Oxoglutarate/iron-dependent dioxygenase		2-oxoglutarate (2OG) and Fe(II)-dependent oxygenase superfamily protein
237	gene10374	PARG12611m01*	LOC103327019	PRUPE_4G263100	0	96.5	PREDICTED: probable inactive 2-oxoglutarate-dependent dioxygenase AOP2	Oxoglutarate/iron-dependent dioxygenase		2-oxoglutarate (2OG) and Fe(II)-dependent oxygenase superfamily protein
238	gene10395	PARG18889m01*	LOC103327046	PRUPE_4G266400	3.2e-114	97.4	PREDICTED: nudix hydrolase 26. chloroplastic	NUDIX hydrolase domain	AT3G10620	nudix hydrolase homolog 26
239	gene10706	PARG16017m01*	LOC103327447	PRUPE_4G267600	0	98.3	PREDICTED: uncharacterized protein LOC103327168	Protein of unknown function DUF4228, plant	AT5G12340
240	gene10618	PARG16093m01*	LOC103327358	PRUPE_4G280800	0	96.8	PREDICTED: transcription factor TGA2-like	Transcription factor TGA like domain
241	gene19384	***	LOC103337178	PRUPE_5G017800	0	97.3	PREDICTED: methanol O-anthraniloyltransferase-like	Transferase		HXXXD-type acyl-transferase family protein
242	gene19385	PARG22901m03*	LOC107881614	PRUPE_5G018100	0	98.1	PREDICTED: methanol O-anthraniloyltransferase-like	Transferase		HXXXD-type acyl-transferase family protein
243	gene19618	PARG02133m01*	LOC103337275	PRUPE_5G043600	0	98.6	PREDICTED: probable inactive 2-oxoglutarate-dependent dioxygenase AOP2	Oxoglutarate/iron-dependent dioxygenase		2-oxoglutarate (2OG) and Fe(II)-dependent oxygenase superfamily protein
244	gene19667	PARG23901m04*	LOC103337595	PRUPE_5G062200	1.7e-127	99.2	PREDICTED: ATPase 11. plasma membrane-type-like	P-type ATPase		H(+)-ATPase 11
245	gene19679	PARG23952m01*	LOC103337600	PRUPE_5G063400	0	96.9	PREDICTED: putative RING-H2 finger protein ATL21A	Wall-associated receptor kinase, galacturonan-binding domain		RING/U-box superfamily protein
246	gene19797	PARG23930m03*	LOC103337633	PRUPE_5G074200	0	97.8	PREDICTED: probable WRKY transcription factor 15	WRKY domain		WRKY DNA-binding protein 21
247	gene20141	PARG23930m03*	LOC103337710	PRUPE_5G107400	0	99	PREDICTED: respiratory burst oxidase homolog protein A	Cytochrome b245, heavy chain	AT1G64060	respiratory burst oxidase protein F
248	gene20189	PARG24159m04*	LOC103337871	PRUPE_5G108500	0	94.5	PREDICTED: uncharacterized protein LOC103337632			Late embryogenesis abundant (LEA) hydroxyproline-rich glycoprotein family
249	gene20181	PARG23930m03*	LOC107881566	PRUPE_5G108600	3.7e-158	93.5	PREDICTED: uncharacterized protein LOC107881566			Late embryogenesis abundant (LEA) hydroxyproline-rich glycoprotein family
250	gene20149	PARG24279m06*	LOC103337860	PRUPE_5G111900	7.5e-104	97.6	PREDICTED: uncharacterized protein LOC103337600	Glyoxalase/Bleomycin resistance protein/Dihydroxybiphenyl dioxygenase	AT5G41650	Lactoylglutathione lyase / glyoxalase I family protein
251	gene6360	***	LOC107880486	PRUPE_5G115000	0.000156	46.2		Aminotransferase-like, plant mobile domain		Aminotransferase-like, plant mobile domain family protein
252	gene3453	PARG09107m04*	LOC107880309	PRUPE_5G131100	0	96.4	PREDICTED: zinc finger MYM-type protein 1-like
253	gene20392	PARG24540m01*	LOC103337956	PRUPE_5G131600	0	98	PREDICTED: growth-regulating factor 8	WRC domain	AT4G24150	growth-regulating factor 8
254	gene20381	***	LOC103337951	PRUPE_5G133500	0	98.5	PREDICTED: subtilisin-like protease SBT3.4	Peptidase S8/S53 domain		Subtilase family protein
255	gene25790	PARG18250m01**	LOC103344134	PRUPE_5G134400	0	98.6	PREDICTED: caffeic acid 3-O-methyltransferase-like	O-methyltransferase domain	AT1G33030	O-methyltransferase 1
256	gene24554	PARG22622m01**	LOC103342702	PRUPE_5G141600	1.3e-21	93.2	PREDICTED: uncharacterized protein LOC103342537			cold, circadian rhythm, and RNA binding 1
257	gene20681	PARG01122m01**	LOC103338780	PRUPE_5G145600	2.1e-135	95.9	PREDICTED: uncharacterized protein LOC103338123	Histidine kinase/HSP90-like ATPase superfamily	AT3G48770	DNA binding;ATP binding
258	gene20601	PARG25128m02*	LOC103338763	PRUPE_5G153000	1.3e-120	98.7	PREDICTED: protein ROOT INITIATION DEFECTIVE 3-like isoform X1	WD40 repeat		Transducin/WD40 repeat-like superfamily protein
259	gene20599	***	LOC103338466	PRUPE_5G153200	2.1e-135	98.8	PREDICTED: beta-glucosidase 24-like	Glycoside hydrolase family 1	AT5G26000	beta glucosidase 13
260	gene20482	PARG24912m01*	LOC103338461	PRUPE_5G163700	0	98.1	PREDICTED: cytochrome P450 71A1-like	Cytochrome P450		cytochrome P450, family 71, subfamily A, polypeptide 25
261	gene20479	***	LOC103338208	PRUPE_5G164100	0	98.5	PREDICTED: cytochrome P450 71A1-like	Cytochrome P450		cytochrome P450, family 71, subfamily A, polypeptide 20
262	gene20472	PARG24179m01*	LOC103338123	PRUPE_5G164700	0	98.5	PREDICTED: uncharacterized protein LOC103337946	Protein of unknown function DUF868, plant		Plant protein of unknown function (DUF868)
263	gene20442	***	LOC103338042	PRUPE_5G167300	1.1e-103	97.6	PREDICTED: uncharacterized protein LOC103337921 isoform X2	Pentatricopeptide repeat	AT1G64310	Tetratricopeptide repeat (TPR)-like superfamily protein
264	gene20444	PARG24422m08*	LOC103338045	PRUPE_5G167500	4.4e-13	92.7
265	gene20935	PARG25239m01*	LOC103338913	PRUPE_5G199300	0	97.6	PREDICTED: protein WEAK CHLOROPLAST MOVEMENT UNDER BLUE LIGHT 1-like	WEB family		Plant protein of unknown function (DUF827)
266	gene21279	PARG26002m01**	LOC103339246	PRUPE_5G219700	0	97.3	PREDICTED: cytochrome P450 CYP736A12-like	Cytochrome P450		Cytochrome P450 superfamily protein
267	gene21229	PARG11000m01**	LOC103338998	PRUPE_5G224400	0	98.2	PREDICTED: L-Ala-D/L-amino acid epimerase	Mandelate racemase/muconate lactonizing enzyme, N-terminal domain	AT3G18270	cytochrome P450, family 77, subfamily A, polypeptide 5 pseudogene
268	gene21352	PARG25344m01*	LOC103339370	PRUPE_5G237800	4.8e-138	98.5	PREDICTED: purple acid phosphatase 3-like	Calcineurin-like phosphoesterase domain, ApaH type		purple acid phosphatase 3
269	gene1247	PARG18407m04*	LOC103329769	PRUPE_6G004900	0	98.6	PREDICTED: phosphatidylinositol N-acetylglucosaminyltransferase gpi3 subunit-like isoform X3	Glycosyl transferase, family 1	AT3G45100	UDP-Glycosyltransferase superfamily protein
270	gene8122	PARG03705m01*	LOC103324383	PRUPE_6G005300	0	98.7		Pheophorbide a oxygenase	AT4G25650	ACD1-like
271	gene107	PARG16035m02*	LOC103327460	PRUPE_6G013200	0	98	PREDICTED: peroxidase A2-like	Plant peroxidase	AT4G08780	peroxidase 2
272	gene23961	PARG01004m01**	LOC107880242	PRUPE_6G020500	0	96.8	PREDICTED: G-type lectin S-receptor-like serine/threonine-protein kinase RLK1	Protein kinase domain		receptor-like protein kinase 1
273	gene396	PARG00176m01*	LOC103319605	PRUPE_6G022800	0	97.9	PREDICTED: serine/threonine-protein kinase UCNL	Protein kinase domain	AT1G51170	AGC (cAMP-dependent, cGMP-dependent and protein kinase C) kinase family protein
274	gene255	PARG00297m02*	LOC107881428	PRUPE_6G034400	3.5e-99	97.5
275	gene214	PARG26613m03*	LOC103339544	PRUPE_6G040400	0	98.4	PREDICTED: trans-cinnamate 4-monooxygenase	Cytochrome P450	AT2G30490	cinnamate-4-hydroxylase
276	gene514	PARG00498m01*	LOC103320961	PRUPE_6G056100	0	97	PREDICTED: omega-3 fatty acid desaturase. chloroplastic-like	Fatty acid desaturase domain	AT2G29980	fatty acid desaturase 8
277	gene576	PARG00256m01*	LOC103321619	PRUPE_6G083000	8.1e-93	70.1	PREDICTED: uncharacterized protein LOC103321619	Protein of unknown function DUF1677, Oryza sativa
278	gene711	PARG00768m04*	LOC103322671	PRUPE_6G085900	0	98.8	PREDICTED: 12S seed storage protein CRD-like	11-S seed storage protein, plant	AT1G07750	RmlC-like cupins superfamily protein
279	gene1011	PARG03930m01*	LOC107881410	PRUPE_6G092200	9.8e-77	90.6	PREDICTED: putative beta-glucosidase 17		AT5G60150
280	gene852	PARG12020m01*	LOC103324892	PRUPE_6G092800	0	93.1	PREDICTED: LOW QUALITY PROTEIN: interactor of constitutive active ROPs 3	Interactor of constitutive active ROPs	AT5G60210	ROP interactive partner 5
281	gene6982	PARG04592m01**	LOC103323098	PRUPE_6G094400	0	97.8	PREDICTED: major allergen Pru ar 1-like	Bet v I/Major latex protein		MLP-like protein 423
282	gene9182	PARG11375m04*	LOC103325558	PRUPE_6G095700	0	98.7		Transcription factor, GTP-binding domain		GTP binding Elongation factor Tu family protein
283	gene932	PARG11079m01*	LOC103325861	PRUPE_6G104000	0	98.7	PREDICTED: putative cyclic nucleotide-gated ion channel 15	Cyclic nucleotide-binding domain	AT2G28260	cyclic nucleotide-gated channel 15
284	gene1043	PARG15366m01*	LOC103328081	PRUPE_6G115200	0	97.3	PREDICTED: lysosomal Pro-X carboxypeptidase-like	Peptidase S28	AT5G22860	Serine carboxypeptidase S28 family protein
285	gene1110	PARG10115m03*	LOC103327131	PRUPE_6G121800	0	98.2	PREDICTED: pleiotropic drug resistance protein 2-like	ABC transporter-like		pleiotropic drug resistance 6
286	gene1138	PARG15082m01*	LOC103328260	PRUPE_6G125000	0	98.9	PREDICTED: probable LRR receptor-like serine/threonine-protein kinase At1g53420	Protein kinase domain		Leucine-rich repeat transmembrane protein kinase
287	gene1165	PARG00063m07*	LOC103329206	PRUPE_6G126100	9.1e-142	97.5	PREDICTED: probable LRR receptor-like serine/threonine-protein kinase At1g53420	Protein kinase domain		Leucine-rich repeat transmembrane protein kinase
288	gene1199	PARG14104m01*	LOC103328964	PRUPE_6G135100	0	97.9	PREDICTED: capsanthin/capsorubin synthase. chromoplastic-like	Lycopene cyclase, beta/epsilon		lycopene cyclase
289	gene25995	PARG03360m02*	LOC107880134	PRUPE_6G141100	0	98.3	PREDICTED: pathogenesis-related protein PR-4	Barwin domain		pathogenesis-related 4
290	gene25769	PARG01365m01*	LOC103344094	PRUPE_6G142200	0	96	PREDICTED: rust resistance kinase Lr10-like	Protein kinase domain		suppressor of npr1-1 constitutive 4
291	gene25429	PARG19509m01**	LOC103343779	PRUPE_6G156300	0	95.7	PREDICTED: beta-glucosidase 11-like	Glycoside hydrolase family 1	AT4G27820	beta glucosidase 11
292	gene1378	PARG18219m01**	LOC103331875	PRUPE_6G156400	4.6e-133	98.4	PREDICTED: beta-glucosidase 11-like	Glycoside hydrolase family 1	AT4G27820	beta glucosidase 11
293	gene24617	PARG22618m01*	LOC103342707	PRUPE_6G157800	3e-61	95.8	PREDICTED: NAD(P)H-quinone oxidoreductase subunit O. chloroplastic isoform X1	NAD(P)H-quinone oxidoreductase subunit O	AT1G74880	NAD(P)H:plastoquinone dehydrogenase complex subunit O
294	gene1633	PARG19513m01*	LOC103333737	PRUPE_6G182000	0	98.4	PREDICTED: uncharacterized protein LOC103333562		AT5G10110
295	gene1590	PARG19556m01*	LOC103333699	PRUPE_6G187200	0	98.2	PREDICTED: BTB/POZ domain-containing protein DOT3	BTB/POZ domain	AT5G10250	Phototropic-responsive NPH3 family protein
296	gene1605	PARG01784m02*	LOC103333562	PRUPE_6G189600	0	98.9	PREDICTED: monoacylglycerol lipase ABHD6	Alpha/beta hydrolase fold-1	AT4G39955	alpha/beta-Hydrolases superfamily protein
297	gene24628	PARG18324m01*	LOC103342790	PRUPE_6G193000	1.9e-53	87.7	PREDICTED: L10-interacting MYB domain-containing protein-like	Myb/SANT-like domain
298	gene1690	PARG01907m01**	LOC103334527	PRUPE_6G195500	0	98.3	PREDICTED: protein DETOXIFICATION 27-like	Multi antimicrobial extrusion protein	AT5G44050	MATE efflux family protein
299	gene1722	***	LOC103334964	PRUPE_6G199400	0	97.7	PREDICTED: disease resistance protein RPM1-like	Leucine-rich repeat		NB-ARC domain-containing disease resistance protein
300	gene25372	PARG19510m01*	LOC103343778	PRUPE_6G200200	0	95.5	PREDICTED: disease resistance protein RPM1-like	NB-ARC		NB-ARC domain-containing disease resistance protein
301	gene1740	***	LOC103335056	PRUPE_6G201200	4.8e-108	98.6	PREDICTED: guanosine nucleotide diphosphate dissociation inhibitor At5g09550-like	Rab GDI protein		GDP dissociation inhibitor family protein / Rab GTPase activator family protein
302	gene1758	PARG22163m01**	LOC103336181	PRUPE_6G202800	0	96.5	PREDICTED: LOW QUALITY PROTEIN: putative U-box domain-containing protein 50	Protein kinase domain	AT5G65500	U-box domain-containing protein kinase family protein
303	gene1786	PARG21500m07*	LOC103335740	PRUPE_6G207700	0	98.8	PREDICTED: probable mannitol dehydrogenase	Alcohol dehydrogenase, zinc-type, conserved site		elicitor-activated gene 3-1
304	gene1787	PARG21684m01*	LOC103335844	PRUPE_6G207900	0	98.1	PREDICTED: probable mannitol dehydrogenase isoform X2	Alcohol dehydrogenase, zinc-type, conserved site		elicitor-activated gene 3-1
305	gene1791	PARG21785m01**	LOC103335903	PRUPE_6G208400	6.8e-133	97.4	PREDICTED: probable rhamnogalacturonate lyase B	Galactose-binding-like domain superfamily	AT2G22620	Rhamnogalacturonate lyase family protein
306	gene1792	PARG22117m01*	LOC103336265	PRUPE_6G208500	0	97.9	PREDICTED: L-type lectin-domain containing receptor kinase IX.1	Protein kinase domain		Concanavalin A-like lectin protein kinase family protein
307	gene1946	PARG23910m01*	LOC103337632	PRUPE_6G226200	0	98.7	PREDICTED: zinc finger protein 7-like	Zinc finger C2H2-type		zinc finger protein 7
308	gene1956	PARG23930m03*	LOC103337708	PRUPE_6G227100	0	96.2	PREDICTED: cytochrome P450 81E8-like isoform X1	Cytochrome P450	AT5G57220	cytochrome P450, family 81, subfamily D, polypeptide 8
309	gene24241	***	LOC103342535	PRUPE_6G235400	0	98.4	PREDICTED: phenylalanine ammonia-lyase 1	Aromatic amino acid lyase	AT5G04230	PHE ammonia lyase 1
310	gene24216	PARG02674m01*	LOC103342532	PRUPE_6G238600	0	97.3	PREDICTED: NAC transcription factor 29-like	NAC domain		NAC domain containing protein 2
311	gene24212	PARG10486m01**	LOC103342499	PRUPE_6G238900	0	94	PREDICTED: uncharacterized protein LOC103342112	Ubiquitin domain		ubiquitin 4
312	gene2290	PARG27828m01*	LOC103340863	PRUPE_6G246000	0	98.3	PREDICTED: uncharacterized protein LOC103340203 isoform X2	Putative zinc- or iron-chelating domain containing protein	AT5G02710
313	gene2278	PARG27828m03*	LOC103340861	PRUPE_6G247200	0	97.8	PREDICTED: exocyst complex component EXO70A1-like	Exocyst complex component Exo70	AT3G09520	exocyst subunit exo70 family protein H4
314	gene2136	PARG26400m01*	LOC103339373	PRUPE_6G261500	0	98	PREDICTED: L-type lectin-domain containing receptor kinase IV.1-like	Protein kinase domain		receptor lectin kinase
315	gene2117	***	LOC103339178	PRUPE_6G263400	0	98.3	PREDICTED: protein RETICULATA. chloroplastic	Protein RETICULATA-related	AT2G37860	Protein of unknown function (DUF3411)
316	gene2074	PARG02494m01*	LOC103338941	PRUPE_6G267800	3.9e-172	98.2	PREDICTED: uncharacterized protein LOC103338466	PAR1	AT3G54040	PAR1 protein
317	gene25051	PARG01655m01*	LOC103343477	PRUPE_6G274700	0	97.7	PREDICTED: lactosylceramide 4-alpha-galactosyltransferase-like	Glycosyltransferase, DXD sugar-binding motif		alpha 1,4-glycosyltransferase family protein
318	gene2442	PARG14506m01*	LOC103342668	PRUPE_6G298800	0	97	PREDICTED: uncharacterized protein LOC103342532
319	gene2707	PARG10486m01**	LOC107880145	PRUPE_6G301600	2.1e-127	94.1		Protein kinase domain	AT1G79620	Leucine-rich repeat protein kinase family protein
320	gene2932	PARG03076m01*	LOC103318622	PRUPE_6G341400	4.3e-141	97.2	PREDICTED: uncharacterized protein LOC103318622
321	gene3155	PARG03267m01*	LOC103318826	PRUPE_6G364800	0	98.1	PREDICTED: omega-hydroxypalmitate O-feruloyl transferase	Transferase	AT1G65450	HXXXD-type acyl-transferase family protein
322	gene21628	PARG26587m01**	LOC103339554	PRUPE_7G047700	1.4e-141	97.5	PREDICTED: endoribonuclease Dicer homolog 2-like	Ribonuclease III domain	AT3G03300	dicer-like 2
323	gene25851	PARG02700m01*	LOC103344531	PRUPE_7G054200	0	97.6	PREDICTED: putative calcium-transporting ATPase 11. plasma membrane-type. partial	P-type ATPase	AT2G41560	autoinhibited Ca2+-ATPase 11
324	gene24468	PARG01618m03*	LOC103342560	PRUPE_7G056700	0	97.2	PREDICTED: heat stress transcription factor B-3	Heat shock factor (HSF)-type, DNA-binding	AT2G41690	heat shock transcription factor B3
325	gene24465	PARG16113m01**	LOC103342537	PRUPE_7G057100	2.5e-95	97		Bifunctional inhibitor/plant lipid transfer protein/seed storage helical domain		Bifunctional inhibitor/lipid-transfer protein/seed storage 2S albumin superfamily protein
326	gene10220	PARG09544m02*	LOC103326819	PRUPE_7G061200	3.3e-14	89.9		Myb/SANT-like domain
327	gene21740	PARG26862m01**	LOC103339825	PRUPE_7G065400	0	98.2	PREDICTED: LOW QUALITY PROTEIN: uncharacterized protein LOC103339370	Toll/interleukin-1 receptor homology (TIR) domain		disease resistance protein (TIR-NBS-LRR class), putative
328	gene21898	PARG27743m01*	LOC103340750	PRUPE_7G092000	0	98.5	PREDICTED: uncharacterized protein At5g39865	Glutaredoxin	AT5G06470	Glutaredoxin family protein
329	gene21884	PARG27428m02*	LOC103340351	PRUPE_7G093400	0	97.1	PREDICTED: syntaxin-121-like	Target SNARE coiled-coil homology domain	AT3G11820	syntaxin of plants 121
330	gene22182	PARG27724m01*	LOC103340770	PRUPE_7G128600	3.9e-172	96.1	PREDICTED: uncharacterized protein LOC103339825	Di-haem cytochrome, transmembrane	AT2G36885
331	gene22633	PARG27828m03*	LOC103340864	PRUPE_7G178600	0	98.3	PREDICTED: probable acyl-activating enzyme 1. peroxisomal	AMP-dependent synthetase/ligase	AT1G76290	acyl activating enzyme 1
332	gene12233	PARG13381m01*	LOC103329641	PRUPE_7G178800	3.3e-93	88.2	PREDICTED: zinc finger MYM-type protein 1-like	Strictosidine synthase		strictosidine synthase-like 4
333	gene6308	PARG10353m01**	LOC107880691	PRUPE_7G194800	2.4e-84	91.4		Tify domain	AT1G74950	jasmonate-zim-domain protein 1
334	gene1763	PARG21418m02*	LOC103335505	PRUPE_7G195000	0	93.1		Glycoside hydrolase, family 28	AT1G19170	Pectin lyase-like superfamily protein
335	gene22990	PARG28087m01*	LOC103341094	PRUPE_7G212500	0	98.1	PREDICTED: inactive protein kinase SELMODRAFT_444075	Protein kinase domain	AT5G56790	Protein kinase protein with adenine nucleotide alpha hydrolases-like domain
336	gene23011	PARG28025m01**	LOC103341147	PRUPE_7G214400	0	97.2	PREDICTED: probable caffeoyl-CoA O-methyltransferase At4g26220	Class I-like SAM-dependent O-methyltransferase	AT4G26220	S-adenosyl-L-methionine-dependent methyltransferases superfamily protein
337	gene3481	PARG08626m02*	LOC107880543	PRUPE_7G214500	9.1e-85	96.7		Deoxyhypusine synthase	AT5G05920	deoxyhypusine synthase
338	gene23056	PARG28317m01*	LOC103341232	PRUPE_7G218900	0	97.7	PREDICTED: receptor-like protein kinase HSL1	Protein kinase domain		Protein kinase family protein with leucine-rich repeat domain
339	gene23061	PARG28249m01*	LOC103341306	PRUPE_7G219500	0	96.8	PREDICTED: LOW QUALITY PROTEIN: receptor-like protein kinase 5	Protein kinase domain		Protein kinase family protein with leucine-rich repeat domain
340	gene23311	PARG06615m01*	LOC103341429	PRUPE_7G246200	0	96.4	PREDICTED: uncharacterized protein LOC103341094	Phytocyanin domain	AT5G20230	early nodulin-like protein 14
341	gene23427	PARG06725m01*	LOC103341524	PRUPE_7G259000	0	98.4	PREDICTED: chitotriosidase-1-like	Glycoside hydrolase family 18, catalytic domain	AT4G19800	Glycosyl hydrolase family protein with chitinase insertion domain
342	gene23499	PARG06769m01*	LOC103341557	PRUPE_7G266500	0	98	PREDICTED: serine carboxypeptidase II-2	Peptidase S10, serine carboxypeptidase	AT4G30810	serine carboxypeptidase-like 29
343	gene24743	PARG18245m01**	LOC103343022	PRUPE_8G007800	0	95.9	PREDICTED: uncharacterized protein LOC103342702	Protein of unknown function DUF1442		Protein of unknown function (DUF1442)
344	gene24747	PARG18248m01**	LOC103343024	PRUPE_8G008200	0	97.9	PREDICTED: 7-ethoxycoumarin O-deethylase-like	Cytochrome P450		Cytochrome P450 superfamily protein
345	gene19180	PARG23449m01*	LOC103337045	PRUPE_8G012100	0	98.1	PREDICTED: putative disease resistance protein RGA3	Leucine-rich repeat		LRR and NB-ARC domains-containing disease resistance protein
346	gene18878	PARG22582m01*	LOC103336525	PRUPE_8G045400	0	98.5	PREDICTED: glutamate--tRNA ligase. cytoplasmic-like	Glutamyl/glutaminyl-tRNA synthetase	AT5G26710	Glutamyl/glutaminyl-tRNA synthetase, class Ic
347	gene18792	PARG22107m01**	LOC103336268	PRUPE_8G050900	0	98.1	PREDICTED: bromodomain-containing protein 3-like	Bromodomain		nuclear protein X1
348	gene18633	PARG01969m01*	LOC103335911	PRUPE_8G066500	0	97.2		Oxoglutarate/iron-dependent dioxygenase		2-oxoglutarate (2OG) and Fe(II)-dependent oxygenase superfamily protein
349	gene18535	PARG21774m01*	LOC103335908	PRUPE_8G079800	0	97.2	PREDICTED: putative disease resistance protein At1g50180	NB-ARC	AT1G50180	NB-ARC domain-containing disease resistance protein
350	gene18411	PARG21774m01*	LOC103335907	PRUPE_8G097600	2e-125	94.8	PREDICTED: cyclic nucleotide-gated ion channel 1-like	Cyclic nucleotide-binding domain	AT4G34500	Protein kinase superfamily protein
351	gene18277	PARG21779m01*	LOC103335906	PRUPE_8G107200	0	97.5	PREDICTED: uncharacterized protein LOC103335505	DC1		Cysteine/Histidine-rich C1 domain family protein
352	gene18219	PARG21785m01**	LOC103335905	PRUPE_8G111600	9.1e-134	98.8	PREDICTED: uncharacterized protein LOC103335451
353	gene18635	PARG22005m01*	LOC103336087	PRUPE_8G112300	2.9e-118	87.6	PREDICTED: protein DMR6-LIKE OXYGENASE 2-like	Isopenicillin N synthase-like		KAR-UP oxidoreductase 1
354	gene6225	PARG21090m02*	LOC103322233	PRUPE_8G140900	3.9e-06	86.7	PREDICTED: somatic embryogenesis receptor kinase 1-like	Leucine-rich repeat		Leucine-rich repeat (LRR) family protein
355	gene17868	***	LOC103335451	PRUPE_8G149100	0	97.7	PREDICTED: uncharacterized protein LOC103335056		AT3G19660
356	gene17857	PARG29727m01*	LOC103335338	PRUPE_8G150200	1.4e-120	97.2	PREDICTED: phytosulfokines-like	Phytosulfokine		phytosulfokine 4 precursor
357	gene19169	PARG23149m01**	LOC103336995	PRUPE_8G152300	6.9e-06	100	PREDICTED: cingulin-like		AT4G33740
358	gene17825	PARG29723m01*	LOC103335298	PRUPE_8G153700	0	97.7	PREDICTED: pathogenesis-related protein 1-like	Cysteine-rich secretory protein, allergen V5/Tpx-1-related	AT2G14580	pathogenesis-related gene 1
359	gene17777	PARG27600m01*	LOC103335086	PRUPE_8G156800	0	99	PREDICTED: squalene monooxygenase-like	Squalene epoxidase		FAD/NAD(P)-binding oxidoreductase family protein
360	gene17732	***	LOC103335047	PRUPE_8G173800	0	97.3	PREDICTED: lysine histidine transporter-like 8	Amino acid transporter, transmembrane domain		Transmembrane amino acid transporter family protein
361	gene6423	PARG20701m01*	LOC103322459	PRUPE_8G179500	1.5e-87	87.5	PREDICTED: TMV resistance protein N-like	Leucine-rich repeat	AT4G19910	disease resistance protein (TIR-NBS-LRR class), putative
362	gene17494	PARG20944m02*	LOC103334962	PRUPE_8G183000	0	97.8	PREDICTED: probable L-type lectin-domain containing receptor kinase S.5	Protein kinase domain		Concanavalin A-like lectin protein kinase family protein
363	gene17562	***	LOC103335013	PRUPE_8G190200	0	99	PREDICTED: fimbrin-2	Calponin homology domain	AT5G48460	Actin binding Calponin homology (CH) domain-containing protein
364	gene24842	PARG29515m01*	LOC103343036	PRUPE_8G195200	0	97.2	PREDICTED: uncharacterized protein LOC103342801
365	gene17185	PARG20252m01**	LOC103334596	PRUPE_8G202300	7.4e-122	96.5	PREDICTED: uncharacterized protein LOC103334310 isoform X1	DedA family	AT4G13150
366	gene17423	PARG20651m01*	LOC103334642	PRUPE_8G226700	0	97.4	PREDICTED: 1-aminocyclopropane-1-carboxylate oxidase homolog 11-like	Oxoglutarate/iron-dependent dioxygenase		2-oxoglutarate (2OG) and Fe(II)-dependent oxygenase superfamily protein
367	gene17049	PARG20476m01*	LOC103334310	PRUPE_8G231000	3e-153	98.3
368	gene17077	PARG20234m01*	LOC103334507	PRUPE_8G234000	2.4e-160	97.8	PREDICTED: calmodulin-like protein 11	EF-hand domain		calmodulin-like 11
369	gene6434	PARG20743m01*	LOC103322466	PRUPE_8G237200	3.8e-168	87.4	PREDICTED: TMV resistance protein N-like isoform X1	Toll/interleukin-1 receptor homology (TIR) domain	AT4G19910	disease resistance protein (TIR-NBS-LRR class), putative
370	gene17111	***	LOC103334573	PRUPE_8G237500	0	98.1	PREDICTED: sucrose-binding protein-like	Cupin 1		cupin family protein
371	gene17122	PARG20321m01**	LOC103334583	PRUPE_8G238600	0	96.9		Protein kinase domain		S-locus lectin protein kinase family protein
372	gene17030	PARG20114m05*	LOC103334230	PRUPE_8G238700	2e-174	95.9	PREDICTED: late embryogenesis abundant protein D-34-like	Late embryogenesis abundant protein, SMP subgroup		Seed maturation protein
373	gene17008	PARG20125m03*	LOC103334220	PRUPE_8G241100	3.9e-114	98.2	PREDICTED: uncharacterized protein LOC103334121		AT4G02800
374	gene16987	PARG01912m01**	LOC103334196	PRUPE_8G243100	0	97.9	PREDICTED: basic 7S globulin 2-like	Aspartic peptidase A1 family	AT1G03220	Eukaryotic aspartyl protease family protein
375	gene16982	PARG20072m21*	LOC107881474	PRUPE_8G243200	0	97	PREDICTED: uncharacterized protein LOC107881474 isoform X3	Phenazine biosynthesis PhzF protein	AT1G03210	Phenazine biosynthesis PhzC/PhzF protein
376	gene16735	PARG20092m01*	LOC103334121	PRUPE_8G248700	4.8e-102	98.5	PREDICTED: sugar transporter ERD6-like 7	Sugar/inositol transporter	AT2G48020	Major facilitator superfamily protein
377	gene16777	PARG20115m02*	LOC103334143	PRUPE_8G252800	0	98.3	PREDICTED: protein NETWORKED 3A-like	Protein Networked (NET), actin-binding (NAB) domain		Kinase interacting (KIP1-like) family protein
378	gene16796	***	LOC103334156	PRUPE_8G254700	6.7e-109	99	PREDICTED: uncharacterized protein LOC103333874		AT3G62920
379	gene16897	PARG20159m01*	LOC103334186	PRUPE_8G265500	0	98.8	PREDICTED: major allergen Pru ar 1-like	Bet v I/Major latex protein		MLP-like protein 423
380	gene24551	PARG10222m01*	LOC103342675	PRUPE_I003400	0	96.4	PREDICTED: cytochrome P450 71A25-like	Cytochrome P450		cytochrome P450, family 71, subfamily B, polypeptide 24
381	gene10009	PARG10395m01*	LOC103326461
382	gene10036	PARG07792m01*	LOC107880773
383	gene10041	PARG12368m01*	LOC107880810
384	gene10335	PARG01347m01*	LOC103326863	PRUPE_4G255600	0	93.3	PREDICTED: glucan endo-1.3-beta-glucosidase-like
385	gene1039	PARG10352m01*	LOC103326431	PRUPE_6G11460	3.2e-115	97.1	PREDICTED: serine carboxypeptidase-like 51 isoform X1
386	gene10406	PARG09594m01*	LOC103327071
387	gene10605	PARG00008m01*	LOC103327307
388	gene11017	PARG01306m01*	LOC103327861
389	gene1108	PARG05458m01**	LOC103327061
390	gene1246	PARG12825m01**	LOC103329734	PRUPE_6G004900	8.3e-144	97.6	PREDICTED: pheophytinase. chloroplastic-like
391	gene13140	PARG16446m01*	LOC103330654
392	gene13491	PARG01659m01**	LOC103330627	PRUPE_4G128100	1.3e-55	99.1
393	gene13895	PARG12882m01*	LOC107881233	PRUPE_3G291900	1.4e-54	99.1
394	gene14962	PARG18451m01*	LOC103332263
395	gene1593	PARG19470m02*	LOC103333412	PRUPE_6G187200	0	98.2	PREDICTED: probable mitochondrial adenine nucleotide transporter BTL3
396	gene16126	PARG19678m01*	LOC103333595	PRUPE_2G299200	0	97.8	PREDICTED: protein DETOXIFICATION 35-like
397	gene1684	PARG02388m01*	LOC103334684
398	gene17317	PARG20585m01*	LOC103334698
399	gene17326	PARG20785m01*	LOC103334895
400	gene17404	PARG01954m01*	LOC103334902
401	gene18634	PARG29728m01*	LOC103336010
402	gene18636	PARG22074m01**	LOC103336138	PRUPE_8G066500	0	97.2	PREDICTED: protein DMR6-LIKE OXYGENASE 2-like
403	gene18637	PARG22117m01*	LOC103336170
404	gene18836	PARG01537m01*	LOC103336518
405	gene18890	PARG22901m05*	LOC103336714	PRUPE_2G113200	0	94.2	PREDICTED: TMV resistance protein N-like
406	gene18894	PARG22901m05*	LOC103336766
407	gene19181	PARG23432m01*	LOC103337054	PRUPE_8G012100	0	99.1	PREDICTED: putative disease resistance protein RGA3
408	gene19386	PARG23210m01**	LOC103337200	PRUPE_5G017800	0	97.4	PREDICTED: methanol O-anthraniloyltransferase-like
409	gene20188	PARG24578m01*	LOC103337924	PRUPE_5G108600	0	94.4	PREDICTED: uncharacterized protein LOC103337708
410	gene20193	PARG24584m02*	LOC103337921	PRUPE_5G108600	0	94.8	PREDICTED: uncharacterized protein LOC103337633
411	gene20194	PARG24548m01*	LOC103337946	PRUPE_5G108600	0	95.3	PREDICTED: uncharacterized protein LOC103337710
412	gene21407	PARG25344m01*	LOC103339374
413	gene21744	PARG02328m01*	LOC103340203	PRUPE_7G065400	0	97	PREDICTED: disease resistance protein RPS6-like
414	gene21745	***	LOC103340077	PRUPE_7G065400	0	98	PREDICTED: TMV resistance protein N-like
415	gene23063	PARG06614m07*	LOC103341428	PRUPE_7G218900	0	91.7	PREDICTED: LRR receptor-like serine/threonine-protein kinase HSL2
416	gene23266	PARG06673m01*	LOC103341475
417	gene23752	PARG02182m01**	LOC103342143
418	gene23959	PARG25408m01*	LOC103342400
419	gene24580	PARG07725m01**	LOC107880264	PRUPE_4G203100	0	97.9	PREDICTED: protein ACCELERATED CELL DEATH 6-like
420	gene24822	PARG18324m01*	LOC107881872	PRUPE_2G176100	1e-18	98.1	PREDICTED: uncharacterized protein LOC107881872
421	gene24957	***	LOC103343286	PRUPE_2G167600	0	97.6	PREDICTED: B3 domain-containing protein REM19-like
422	gene25258	PARG17014m01*	LOC103343620
423	gene25316	PARG01566m01*	LOC103343732	PRUPE_2G030900	1.1e-178	97	PREDICTED: proline-rich protein 4-like
424	gene25701	PARG08548m06*	LOC103344057
425	gene25577	PARG24274m01*	LOC103343871
426	gene25868	PARG18222m01**	LOC107880115
427	gene26037	PARG00137m01*	LOC107880138	PRUPE_2G165200	0	93.5	PREDICTED: O-glucosyltransferase rumi homolog. partial
428	gene3839	PARG12413m01**	LOC107880642	PRUPE_1G524800	2.4e-35	96.6
429	gene4105	PARG03836m01**	LOC107880556
430	gene5118	PARG06923m01*	LOC103320996	PRUPE_1G339000	5.3e-92	92.3	PREDICTED: D-galacturonate reductase-like
431	gene5241	***	LOC103321363
432	gene5399	PARG04155m01*	LOC103321388	PRUPE_5G131100	0	97.3	PREDICTED: zinc finger MYM-type protein 1-like
433	gene6358	***	LOC103322392	PRUPE_1G230400	5.3e-23	90.9	PREDICTED: uncharacterized protein LOC103322392
434	gene6424	PARG08545m01**	LOC107880506
435	gene6660	PARG04306m01**	LOC103322740
436	gene6662	PARG04306m01**	LOC103322742
437	gene6981	PARG04592m01**	LOC103323085
438	gene6991	PARG04592m01**	LOC103323089	PRUPE_1G127800	9.2e-166	97.6	PREDICTED: major allergen Pru ar 1-like isoform X2
439	gene6992	PARG04592m01**	LOC103323092
440	gene7064	PARG04490m01**	LOC103323173	PRUPE_4G216800	0.00021	92.9	PREDICTED: glycine-rich cell wall structural protein-like isoform X3
441	gene829	PARG00863m02*	LOC103324520	PRUPE_1G042000	0	96.9
442	gene858	PARG11411m01*	LOC103325002	PRUPE_6G092200	0	97.6	PREDICTED: uncharacterized protein LOC103324785
443	gene8775	PARG11707m01*	LOC103325287
	* gene PARG ID identified directly through the blast information of P. armeniaca (backward step)
	** gene PARG ID identified through mapping of sequences to P. armeniaca genome using gmap (backward step)
	*** gene PARG ID not identified in P. Armeniaca, physical position Suppl. Data Sheet 4
